# Supplementary material for: On the possibility of catalytic reduction of carbonyl moieties with tris(pentafluorophenyl)borane and H2: a computational study
Source: Royal Society of Chemistry journal article supplement (doi:10.1039/b905137f), 2009-01-01
Supplement: b905137f.pdf [file b905137f.pdf]

## On the possibility of catalytic reduction of carbonyl moieties with tris(pentafluorophenyl)borane and H<sub>2</sub>: a computational study

Jonas Nyhlén and Timofei Privalov

### Computational Details

All calculations are performed with the Jaguar 6.0<sup>1</sup> quantum chemistry package. We initially performed a conformational search using potential energy scans with the B3LYP functional using the split-valence double-zeta basis set, 6-31+G\*,<sup>2,3</sup> augmented with diffuse and polarization functions, and the molecular model system formally in gas phase. The geometries of conformers lowest in energy were then re-optimized using B3LYP functionals<sup>4,5</sup> with 6-31+G\* basis set; all degrees of freedom were optimized. All transition states were found with B3LYP/6-31+G\* using the quadratic synchronous transit (QST) method, as implemented in the Jaguar 6.0 computational package, and were characterized by one single imaginary vibrational frequency along the proper reaction coordinate. The reaction coordinate scans have been performed to verify that all reported transition states are indeed “connecting” appropriate intermediates along the reaction pathway.

In order to increase the accuracy of the computation of relative energies of all intermediates and transition states, the larger basis set 6-31++G\*\* was used to obtain final electronic energies of all complexes employing geometries obtained with the 6-31+G\* base set. All thermochemical corrections were computed at the 6-31+G\*. All reported potential energies in Figure 4 are true Gibbs free energies with the account of solvent effects.

Solvent effects were accounted for as follows. Gas-phase optimized structures, B3LYP with 6-31+G\* basis set, were used as starting structures in order to obtain energies of all intermediates and transition

---

<sup>1</sup> Jaguar 6.0, Schrödinger, LLC., Portland, Oregon, 2005.

<sup>2</sup> Hay, P. J.; Wadt, W. R. *J. Chem. Phys.* **1985**, *82*, 299.

<sup>3</sup> (a) W. J. Hehre, R. Ditchfield, J. A. Pople, *J. Chem. Phys.* **1972**, *56*, 2257. (b) M. M. Francl, W. J. Pietro, W. J. Hehre, J. S. Binkley, M. S. Gordon, D. J. Defrees, J. A. Pople, *J. Chem. Phys.* **1982**, *77*, 3654. (c) P. C. Hariharan, J. A. Pople, *Theor. Chim. Acta* **1973**, *28*, 213.

<sup>4</sup> (a) A. D. Becke, *J. Chem. Phys.* **1993**, *98*, 5648. (b) C. Lee, W. Yang, R. G. Parr, *Phys. Rev. B* **1988**, *37*, 785.

<sup>5</sup> B. J. Lynch, P. L. Fast, M. Harris, D. G. Truhlar, *J. Phys. Chem. A* **2000**, *104*, 7650.

states in solvent within the self-consistent reaction field model<sup>6</sup> with toluene, dichloromethane and acetonitrile as solvents at the large basis set level (6-31++G\*\*). Thus, solvent correction to all the Gibbs free energies and the potential energies has been obtained. This data was used to construct the Gibbs free energy profiles and for the discussion of relative energies in the text. To check the stability of solvated complexes, geometry has been relaxed and optimized within the self-consistent implicit solvent model.

|    |   | DCM dG corrected | toluene dG corrected | acetonitrile dG corrected | Gas dG corrected |
|----|---|------------------|----------------------|---------------------------|------------------|
| 2a |   |                  |                      |                           |                  |
|    | 3 | 0                | 0                    | 0                         | 0                |

<sup>6</sup> Jaguar 6.0 package treats solvated molecular systems with SCRF method, using its own Poisson-Boltzmann solver, which makes possible to compute solvation energies and minimum-energy solvated structures of solvated transition states. For details see: (a) Tannor, D. J.; Marten, B.; Murphy, R.; Friesner, R. A.; Sitkoff, D.; Nicholls, A.; Ringnalda, M.; Goddard, W. A., III; Honig, B. *J. Am. Chem. Soc.* **1994**, *116*, 11875. (b) Marten, B.; Kim, K.; Cortis, C.; Friesner, R. A.; Murphy, R. B.; Ringnalda, M. N.; Sitkoff, D.; Honig, B. *J. Phys. Chem.* **1996**, *100*, 11775; (c) Cramer, C.J.; Truhlar, D., G.; *Chem. Rev.*, **1999**, *99*, 2161-2200.

|           |                   |              |              |              |              |
|-----------|-------------------|--------------|--------------|--------------|--------------|
|           | TS1               | 26,26844962  | 26,4669599   | 25,81775751  | 26,77538358  |
|           | 4                 | 21,88558824  | 23,44730752  | 21,34061777  | 26,05962788  |
|           | TS2               | 34,60191729  | 35,63719082  | 33,95919896  | 36,70679417  |
|           | Final             | -10,50907763 | -9,235080469 | -10,874365   | -8,601449736 |
|           | TS2 relative to 4 | 12,71632906  | 12,18988331  | 12,6185812   | 10,64716629  |
| <b>2b</b> |                   |              |              |              |              |
|           | 3                 | 0            | 0            | 0            | 0            |
|           | TS1               | 23,04564423  | 23,70873844  | 23,24506628  | 24,80856831  |
|           | 4                 | 19,01576161  | 21,16016722  | 18,60057527  | 24,55254464  |
|           | TS2               | 26,45217698  | 25,43597222  | 27,00372313  | 23,65457926  |
|           | Final             | -12,33798125 | -11,76548254 | -12,05424131 | -12,05763174 |
|           | TS2 relative to 4 | 7,436415363  | 4,275804998  | 8,403147856  | -0,897965379 |
| <b>2c</b> |                   |              |              |              |              |
|           | 3                 | 0            | 0            | 0            | 0            |
|           | TS1               | 22,27647761  | 22,52230591  | 21,86167531  | 23,75484913  |
|           | 4                 | 17,0537079   | 18,77156421  | 16,66465546  | 22,16268661  |
|           | TS2               | 34,54088818  | 34,63350991  | 34,68205032  | 35,058289    |
|           | Final             | -9,953462074 | -9,078691799 | -10,01098466 | -8,599387738 |
|           | TS2 relative to 4 | 17,48718028  | 15,8619457   | 18,01739486  | 12,89560239  |
| <b>2d</b> |                   |              |              |              |              |
|           | 3                 | 0            | 0            | 0            | 0            |
|           | TS1               | 15,28992623  | 15,70933195  | 14,83005176  | 17,01047519  |
|           | 4                 | 8,628087831  | 11,01714641  | 7,781446947  | 14,79807991  |
|           | TS2               | 38,33518575  | 39,11096884  | 37,85912592  | 39,48468932  |
|           | Final             | -15,88842508 | -15,02038359 | -16,15876831 | -14,84565469 |
|           | TS2 relative to 4 | 29,70709792  | 28,09382242  | 30,07767897  | 24,68660941  |

**Table S1.** Summary of all in solvent Gibbs free energies for Scheme 1. All energies are in kcal/mol.

Based on the equilibrium constants reported by Parks et al,<sup>Error! Bookmark not defined.</sup> association energies of adducts **2<sub>a</sub>**-B(C<sub>6</sub>F<sub>5</sub>)<sub>3</sub> and **2<sub>c</sub>**-B(C<sub>6</sub>F<sub>5</sub>)<sub>3</sub> in toluene at room temperatures are only -5.8 kcal/mol and -4.1 kcal/mol, respectively. Computed raw association energies are -8.5 (2a) and -7.4 (2c) in toluene. The thermochemical correction is ca. 4 kcal/mol for both 2a and 2c kcal/mol with the account of solvent effects. Overall, the calculated total association energies are -4.5 and -3.4 for 2a and 2c in toluene, respectively.

### XYZ coordinates, Reference Potential and the Gibbs free energies, Solvent corrections

#### Complex 1:

SCF 6-31\*G+ = -2208.367541  
 SCF 6-31\*\*G++ = -2208.36754  
 Gibbs free energy = -2208.279193  
 sfinal(toluene) = -2.7433 kcal/mol  
 sfinal(acetonitrile) = -6.3275 kcal/mol  
 sfinal(DCM) = -5.4549 kcal/mol

34

C 1.152906 -0.103694 2.738553  
 C 0.175201 -0.246072 1.741815

|   |           |           |           |
|---|-----------|-----------|-----------|
| C | -1.112266 | 0.185025  | 2.096605  |
| C | -1.415355 | 0.730152  | 3.339063  |
| C | -0.410858 | 0.839841  | 4.299076  |
| C | 0.882323  | 0.414608  | 3.999933  |
| B | 0.499293  | -0.847498 | 0.327195  |
| F | -2.118337 | 0.109589  | 1.202996  |
| F | -2.656518 | 1.145443  | 3.623239  |
| F | -0.686488 | 1.350136  | 5.500281  |
| F | 1.846682  | 0.512326  | 4.924569  |
| F | 2.417181  | -0.508278 | 2.505327  |
| C | 1.846739  | -0.480222 | -0.390747 |
| C | 2.591628  | -1.422956 | -1.115795 |
| C | 3.793139  | -1.119861 | -1.746034 |
| C | 4.285510  | 0.182620  | -1.685176 |
| C | 3.576824  | 1.158697  | -0.986953 |
| C | 2.390367  | 0.813020  | -0.350162 |
| F | 2.166289  | -2.699091 | -1.197944 |
| F | 4.477097  | -2.060265 | -2.410482 |
| F | 5.431123  | 0.494097  | -2.293240 |
| F | 4.045284  | 2.412256  | -0.934102 |
| F | 1.740917  | 1.797470  | 0.301986  |
| C | -0.523345 | -1.817070 | -0.366892 |
| C | -0.783978 | -1.772473 | -1.745298 |
| C | -1.693462 | -2.614881 | -2.374696 |
| C | -2.371275 | -3.571356 | -1.620784 |
| C | -2.139461 | -3.663559 | -0.249545 |
| C | -1.240000 | -2.788577 | 0.348831  |
| F | -0.163053 | -0.860819 | -2.519409 |
| F | -1.921231 | -2.519931 | -3.691336 |
| F | -3.238711 | -4.396053 | -2.209489 |
| F | -2.784640 | -4.587338 | 0.474414  |
| F | -1.047061 | -2.927687 | 1.675358  |

### Complex 1':

SCF 6-31\*G+ = -1910.690187  
SCF 6-31\*\*G++ = -1910.69485  
sfinal(toluene)= -4.4794 kcal/mol  
sfinal(acetonitrile)= -9.2962 kcal/mol  
sfinal(DCM)= -8.1624 kcal/mol

34

|   |           |           |          |
|---|-----------|-----------|----------|
| C | -0.109757 | 1.897049  | 4.009919 |
| C | -1.082691 | 0.966898  | 3.615945 |
| C | -2.393293 | 1.242956  | 4.032339 |
| C | -2.713745 | 2.372496  | 4.777851 |
| C | -1.727836 | 3.271141  | 5.164441 |
| C | -0.419130 | 3.016022  | 4.775662 |
| B | -0.726292 | -0.304732 | 2.765342 |
| C | -1.395875 | -1.684959 | 3.100499 |
| C | -1.582593 | -2.123668 | 4.419393 |
| C | -2.167989 | -3.349282 | 4.718656 |
| C | -2.619021 | -4.186868 | 3.706563 |
| C | -2.457206 | -3.771590 | 2.391033 |
| C | -1.848701 | -2.555618 | 2.098782 |
| F | -1.158030 | -1.361529 | 5.449368 |
| F | -2.301607 | -3.722470 | 6.006130 |
| F | -2.888926 | -4.554683 | 1.383861 |
| F | -1.729760 | -2.207837 | 0.799910 |
| F | -3.399937 | 0.414695  | 3.681996 |

Supplementary Material (ESI) for Dalton Transactions  
This journal is © The Royal Society of Chemistry 2009

|   |           |           |           |
|---|-----------|-----------|-----------|
| F | -3.995194 | 2.591505  | 5.131152  |
| F | 0.563919  | 3.862274  | 5.138358  |
| F | 1.183170  | 1.703519  | 3.673885  |
| C | 0.299037  | -0.194197 | 1.580737  |
| C | 0.306002  | 0.896653  | 0.699116  |
| C | 1.206545  | 0.993066  | -0.356308 |
| C | 2.164013  | 0.008874  | -0.565378 |
| C | 2.187182  | -1.077242 | 0.300000  |
| C | 1.267702  | -1.179070 | 1.338512  |
| F | -0.604112 | 1.883395  | 0.840581  |
| F | 1.350507  | -2.255941 | 2.148116  |
| F | 3.106091  | -2.047513 | 0.131988  |
| F | 1.149641  | 2.057273  | -1.179920 |
| H | -1.973003 | 4.148045  | 5.753591  |
| H | -3.084498 | -5.138866 | 3.937034  |
| H | 2.873600  | 0.086216  | -1.381862 |

**Complex 2a:**

SCF 6-31\*G+ = -345.588504112  
SCF 6-311\*\*G++ = -345.597701559  
sfinal(toluene)= -3.5942 kcal/mol  
sfinal(acetonitrile)= -7.6624 kcal/mol  
sfinal(DCM)= -6.6290 kcal/mol

14

|   |           |           |          |
|---|-----------|-----------|----------|
| C | 0.128738  | -0.524982 | 0.000000 |
| C | 0.130923  | -2.005561 | 0.000000 |
| C | 1.349493  | 0.166111  | 0.000000 |
| C | 1.366676  | 1.561786  | 0.000000 |
| C | 0.161022  | 2.268747  | 0.000000 |
| C | -1.061275 | 1.582947  | 0.000000 |
| C | -1.080076 | 0.190814  | 0.000000 |
| H | 2.283504  | -0.392988 | 0.000000 |
| H | 2.312866  | 2.096220  | 0.000000 |
| H | 0.171460  | 3.355850  | 0.000000 |
| H | -1.995110 | 2.139032  | 0.000000 |
| H | -2.015716 | -0.361041 | 0.000000 |
| O | -0.866418 | -2.705749 | 0.000000 |
| H | 1.140421  | -2.471356 | 0.000000 |

**Complex 3a:**

SCF 6-31\*G+ = -2553.96971475  
SCF 6-311\*\*G++ = -2553.978832334  
sfinal(toluene)= -6.2943 kcal/mol  
sfinal(acetonitrile)= -13.1958 kcal/mol  
sfinal(DCM)= -11.3830 kcal/mol

48

|   |           |          |           |
|---|-----------|----------|-----------|
| C | -0.475311 | 3.697245 | -2.281545 |
| C | -1.513259 | 2.762692 | -2.078037 |
| C | -2.811427 | 3.021866 | -2.563085 |
| C | -3.070058 | 4.203112 | -3.250993 |
| C | -2.036119 | 5.123603 | -3.453899 |
| C | -0.743150 | 4.872432 | -2.970120 |
| C | -1.286012 | 1.527169 | -1.376577 |
| H | -2.131633 | 0.843155 | -1.243189 |
| O | -0.166060 | 1.202775 | -0.927954 |

|   |           |           |           |
|---|-----------|-----------|-----------|
| B | 0.197147  | -0.147419 | -0.131166 |
| C | -0.761230 | -1.316920 | -0.763945 |
| C | -0.758718 | -1.553862 | -2.145435 |
| C | -1.520736 | -2.531995 | -2.773825 |
| C | -2.347912 | -3.346295 | -2.004034 |
| C | -2.396077 | -3.153360 | -0.628583 |
| C | -1.618244 | -2.153676 | -0.041328 |
| F | 0.024331  | -0.792373 | -2.949808 |
| F | -1.466841 | -2.699346 | -4.105095 |
| F | -3.095161 | -4.293182 | -2.584162 |
| F | -3.199704 | -3.920568 | 0.124056  |
| F | -1.742972 | -2.036567 | 1.298071  |
| C | -0.021926 | 0.162769  | 1.464702  |
| C | -0.809248 | 1.173971  | 2.016332  |
| C | -0.909459 | 1.425360  | 3.383027  |
| C | -0.211963 | 0.625248  | 4.279897  |
| C | 0.566240  | -0.418285 | 3.787018  |
| C | 0.641621  | -0.624773 | 2.413479  |
| F | -1.564549 | 1.987436  | 1.223749  |
| F | -1.678671 | 2.429977  | 3.836095  |
| F | -0.297012 | 0.847370  | 5.598185  |
| F | 1.227827  | -1.217635 | 4.638202  |
| F | 1.382672  | -1.680202 | 2.006038  |
| C | 1.798061  | -0.282599 | -0.456995 |
| C | 2.448505  | -1.449080 | -0.866829 |
| C | 3.821127  | -1.527710 | -1.094859 |
| C | 4.614836  | -0.400553 | -0.910882 |
| C | 4.018876  | 0.784954  | -0.493426 |
| C | 2.645155  | 0.816894  | -0.272130 |
| F | 1.757822  | -2.598139 | -1.043616 |
| F | 4.382995  | -2.683521 | -1.484522 |
| F | 5.936227  | -0.455166 | -1.126192 |
| F | 4.771305  | 1.882999  | -0.301192 |
| F | 2.142156  | 1.999062  | 0.164285  |
| H | -3.605526 | 2.297847  | -2.396375 |
| H | -4.067405 | 4.409014  | -3.627555 |
| H | -2.237101 | 6.046056  | -3.992324 |
| H | 0.047568  | 5.598509  | -3.133396 |
| H | 0.516331  | 3.484969  | -1.894003 |

**Complex TS1a:**

SCF 6-31\*G+ = -2555.113540995  
SCF 6-311\*\*G++ = -2555.127691191  
sfinal(toluene)= -6.6026 kcal/mol  
sfinal(acetonitrile)= -14.1533 kcal/mol  
sfinal(DCM)= -11.8899 kcal/mol

50

|   |           |           |           |
|---|-----------|-----------|-----------|
| F | 1.505428  | 0.593705  | 2.855700  |
| C | 1.269775  | 0.509664  | 1.522727  |
| C | -0.012693 | 0.187360  | 1.067425  |
| C | -0.139820 | 0.120789  | -0.322782 |
| C | 0.913517  | 0.366021  | -1.202014 |
| C | 2.167790  | 0.693152  | -0.696817 |
| C | 2.348428  | 0.765174  | 0.681578  |
| B | -1.224891 | -0.061842 | 2.110867  |
| C | -1.081154 | -1.342947 | 3.091090  |
| C | -1.620037 | -1.337005 | 4.379733  |
| C | -1.523393 | -2.404094 | 5.267049  |

|   |           |           |           |
|---|-----------|-----------|-----------|
| C | -0.870184 | -3.564498 | 4.862934  |
| C | -0.327983 | -3.629133 | 3.582966  |
| C | -0.447017 | -2.534438 | 2.728948  |
| F | -1.326405 | -0.198268 | -0.886729 |
| F | 0.729133  | 0.290789  | -2.530648 |
| F | 3.192026  | 0.933950  | -1.527598 |
| F | 3.555437  | 1.078144  | 1.183423  |
| F | -2.277649 | -0.232885 | 4.831847  |
| F | -2.052480 | -2.326463 | 6.500935  |
| F | -0.766681 | -4.607857 | 5.697560  |
| F | 0.293851  | -4.748532 | 3.179864  |
| F | 0.084771  | -2.673535 | 1.495482  |
| C | -2.724700 | 0.239822  | 1.577429  |
| C | -3.229761 | 1.534925  | 1.447760  |
| C | -4.518946 | 1.828155  | 1.012985  |
| C | -5.374182 | 0.785955  | 0.670826  |
| C | -4.918957 | -0.525433 | 0.772309  |
| C | -3.621460 | -0.771322 | 1.217170  |
| F | -2.450231 | 2.603287  | 1.773382  |
| F | -4.943797 | 3.102219  | 0.931166  |
| F | -6.619911 | 1.042289  | 0.248422  |
| F | -5.730886 | -1.538039 | 0.430121  |
| F | -3.236771 | -2.064799 | 1.263793  |
| H | -1.025708 | 0.960016  | 2.998023  |
| H | -0.783937 | 1.661109  | 3.540482  |
| O | -0.522555 | 2.661711  | 4.312146  |
| C | -2.817264 | 4.735505  | 6.182067  |
| C | -1.579584 | 4.281030  | 5.685028  |
| C | -0.385638 | 4.952243  | 6.024410  |
| C | -0.439807 | 6.068594  | 6.848208  |
| C | -1.675535 | 6.518314  | 7.337592  |
| C | -2.862238 | 5.855191  | 7.007661  |
| C | -1.567033 | 3.128400  | 4.814192  |
| H | -2.526332 | 2.646742  | 4.582533  |
| H | 0.559355  | 4.588095  | 5.633191  |
| H | 0.473031  | 6.593030  | 7.114745  |
| H | -1.710827 | 7.394111  | 7.980208  |
| H | -3.812756 | 6.212212  | 7.392276  |
| H | -3.732180 | 4.211111  | 5.916553  |

#### Complex 4a:

SCF 6-31\*G+ = -2555.119383449  
SCF 6-311\*\*G++ = -2555.13499833  
sfinal(toluene) = -8.9065 kcal/mol  
sfinal(acetonitrile) = -17.9147 kcal/mol  
sfinal(DCM) = -15.5570 kcal/mol

50

|   |           |          |           |
|---|-----------|----------|-----------|
| C | -2.925895 | 5.028695 | -0.904069 |
| C | -2.134708 | 4.173883 | -1.708165 |
| C | -1.881088 | 4.494689 | -3.061376 |
| C | -2.412398 | 5.658649 | -3.603931 |
| C | -3.193495 | 6.499795 | -2.802395 |
| C | -3.450363 | 6.186512 | -1.457389 |
| C | -1.568072 | 2.972667 | -1.189770 |
| H | -0.963945 | 2.329812 | -1.833402 |
| O | -1.749065 | 2.602816 | 0.012580  |
| F | 1.214530  | 2.415588 | -0.132862 |
| C | 2.051793  | 1.363401 | -0.390765 |

|   |           |           |           |
|---|-----------|-----------|-----------|
| C | 1.617199  | 0.055157  | -0.184758 |
| C | 2.567559  | -0.920978 | -0.500252 |
| C | 3.843192  | -0.632047 | -0.978492 |
| C | 4.222041  | 0.694613  | -1.166376 |
| C | 3.314435  | 1.704772  | -0.869465 |
| B | 0.107897  | -0.293100 | 0.343984  |
| C | -0.595627 | -1.477569 | -0.542729 |
| C | -1.058339 | -1.209089 | -1.831513 |
| C | -1.678627 | -2.141476 | -2.656199 |
| C | -1.858774 | -3.439583 | -2.189986 |
| C | -1.412325 | -3.767455 | -0.913187 |
| C | -0.796487 | -2.795283 | -0.125600 |
| F | 2.269951  | -2.227110 | -0.332371 |
| F | 4.713732  | -1.616775 | -1.256578 |
| F | 5.444923  | 0.995525  | -1.629995 |
| F | 3.658326  | 2.994752  | -1.053250 |
| F | -0.916897 | 0.047448  | -2.360082 |
| F | -2.104822 | -1.801071 | -3.888206 |
| F | -2.455494 | -4.360910 | -2.961996 |
| F | -1.576624 | -5.019539 | -0.454476 |
| F | -0.380367 | -3.191301 | 1.096380  |
| C | -0.064556 | -0.438870 | 1.962809  |
| C | -1.306361 | -0.186371 | 2.551217  |
| C | -1.558329 | -0.256072 | 3.917682  |
| C | -0.521044 | -0.598476 | 4.779595  |
| C | 0.737950  | -0.860770 | 4.250030  |
| C | 0.939752  | -0.778974 | 2.872663  |
| F | -2.360648 | 0.165977  | 1.760961  |
| F | -2.783362 | 0.006674  | 4.409996  |
| F | -0.731457 | -0.668768 | 6.103399  |
| F | 1.749339  | -1.189646 | 5.072600  |
| F | 2.190869  | -1.058722 | 2.443854  |
| H | -0.563189 | 0.703755  | 0.036112  |
| H | -1.240155 | 1.702151  | 0.189179  |
| H | -1.272706 | 3.829769  | -3.668803 |
| H | -2.222589 | 5.913750  | -4.641790 |
| H | -3.608190 | 7.410158  | -3.227121 |
| H | -4.058674 | 6.851716  | -0.852295 |
| H | -3.111955 | 4.769042  | 0.133410  |

**Complex TS2a:**

SCF 6-31\*G+ = -2555.109426362  
SCF 6-311\*\*G++ = -2555.125502461  
sfinal(toluene)= -7.3638 kcal/mol  
sfinal(acetonitrile)= -15.9433 kcal/mol  
sfinal(DCM)= -13.4878 kcal/mol

50

|   |           |           |           |
|---|-----------|-----------|-----------|
| C | 0.518295  | -1.012935 | 2.585360  |
| C | -0.370088 | -0.460760 | 1.654159  |
| C | -1.537379 | 0.038585  | 2.222248  |
| C | -1.825211 | 0.024820  | 3.583479  |
| C | -0.901319 | -0.522936 | 4.465756  |
| C | 0.281201  | -1.052195 | 3.956889  |
| B | 0.047858  | -0.402453 | 0.076150  |
| C | -0.358797 | -1.698936 | -0.813541 |
| C | -0.172348 | -1.686267 | -2.201686 |
| C | -0.552613 | -2.713055 | -3.055621 |
| C | -1.169193 | -3.842557 | -2.525574 |



|   |           |           |           |
|---|-----------|-----------|-----------|
| C | -1.387345 | -3.910973 | -1.153879 |
| C | -0.987779 | -2.855120 | -0.334725 |
| F | 0.415266  | -0.608954 | -2.786045 |
| F | -0.347483 | -2.617700 | -4.381578 |
| F | -1.558442 | -4.842681 | -3.327249 |
| F | -1.990771 | -4.990183 | -0.630798 |
| F | -1.244803 | -3.011600 | 0.982601  |
| F | -2.521415 | 0.565589  | 1.425808  |
| F | -2.982990 | 0.532257  | 4.043946  |
| F | -1.147771 | -0.546693 | 5.782168  |
| F | 1.179183  | -1.594974 | 4.793156  |
| F | 1.670336  | -1.576268 | 2.158530  |
| C | 1.557418  | 0.192310  | -0.091564 |
| C | 2.648858  | -0.491369 | -0.643609 |
| C | 3.925459  | 0.054192  | -0.756145 |
| C | 4.165217  | 1.346827  | -0.302349 |
| C | 3.122026  | 2.065518  | 0.273120  |
| C | 1.860547  | 1.483137  | 0.359157  |
| F | 2.523561  | -1.767116 | -1.069149 |
| F | 4.929351  | -0.663805 | -1.285804 |
| F | 5.385457  | 1.889269  | -0.407384 |
| F | 3.339236  | 3.311458  | 0.728412  |
| F | 0.886839  | 2.239660  | 0.922549  |
| C | -1.580371 | 1.798029  | -1.148983 |
| C | -2.703729 | 1.086799  | -1.761240 |
| O | -1.708517 | 2.614178  | -0.119292 |
| H | -0.741184 | 2.080724  | -1.782994 |
| H | -2.444500 | 2.343064  | 0.460274  |
| H | -0.740064 | 0.489810  | -0.527556 |
| C | -3.994270 | 1.066694  | -1.196954 |
| C | -5.042552 | 0.452781  | -1.875395 |
| C | -4.824472 | -0.136228 | -3.126509 |
| C | -3.551786 | -0.107123 | -3.703540 |
| C | -2.498285 | 0.505865  | -3.029194 |
| H | -4.198348 | 1.524617  | -0.233547 |
| H | -6.033786 | 0.438352  | -1.431838 |
| H | -5.648043 | -0.614357 | -3.649810 |
| H | -3.380889 | -0.554361 | -4.678423 |
| H | -1.513015 | 0.543025  | -3.482850 |

**Complex 2'a:**

SCF 6-31\*G+ = -346.785819617  
SCF 6-311\*\*G++ = -346.802203229  
sfinal(toluene)= -4.1846 kcal/mol  
sfinal(acetonitrile)= -9.1411 kcal/mol  
sfinal(DCM)= -7.8356 kcal/mol

16

|   |           |           |           |
|---|-----------|-----------|-----------|
| C | 0.025180  | -0.095659 | -0.000265 |
| C | 0.067054  | -0.215107 | 1.506847  |
| C | 1.223794  | -0.063900 | -0.725890 |
| C | 1.210903  | -0.004407 | -2.121023 |
| C | -0.005617 | 0.034356  | -2.808453 |
| C | -1.203507 | 0.012441  | -2.089870 |
| C | -1.190171 | -0.055215 | -0.693726 |
| H | 2.175649  | -0.081093 | -0.197189 |
| H | 2.149267  | 0.021327  | -2.669705 |
| H | -0.018806 | 0.087366  | -3.894288 |
| H | -2.154004 | 0.049738  | -2.616802 |

Supplementary Material (ESI) for Dalton Transactions  
This journal is © The Royal Society of Chemistry 2009

|   |           |           |           |
|---|-----------|-----------|-----------|
| H | -2.119734 | -0.062427 | -0.133945 |
| O | -1.149582 | 0.282161  | 2.065933  |
| H | 0.930097  | 0.345566  | 1.895912  |
| H | -1.150452 | 0.104140  | 3.018216  |
| H | 0.204850  | -1.272018 | 1.787841  |

**Complex 2b:**

SCF 6-31\*G+ = -193.1653748  
SCF 6-311\*\*G++ = -193.173692  
Gibbs free energy = -193.108318  
sfinal(toluene)= -3.6030 kcal/mol  
sfinal(acetonitrile)= -7.4727 kcal/mol  
sfinal(DCM)= -6.5144 kcal/mol

10

|   |           |           |           |
|---|-----------|-----------|-----------|
| C | -0.092214 | -0.005387 | 0.000000  |
| O | -1.310952 | 0.017458  | 0.000000  |
| C | 0.709346  | 1.289575  | 0.000000  |
| C | 0.682567  | -1.308281 | 0.000000  |
| H | 1.791322  | 1.125509  | 0.000000  |
| H | 0.434838  | 1.879885  | -0.881881 |
| H | 0.434838  | 1.879885  | 0.881881  |
| H | -0.003635 | -2.158084 | 0.000000  |
| H | 1.336550  | -1.358697 | -0.881052 |
| H | 1.336550  | -1.358697 | 0.881052  |

**Complex 3b:**

SCF 6-31\*G+ = -2401.54153272479  
SCF 6-311\*\*G++ = -2401.55004339  
Gibbs free energy = -2401.368791  
sfinal(toluene)= -6.4187 kcal/mol  
sfinal(acetonitrile)= -13.6715 kcal/mol  
sfinal(DCM)= -11.4881 kcal/mol

44

|   |           |           |           |
|---|-----------|-----------|-----------|
| B | 0.070620  | -0.158843 | -0.119478 |
| C | -0.094303 | 0.123949  | 1.487710  |
| C | 1.675701  | -0.164376 | -0.456085 |
| C | -0.781949 | -1.402349 | -0.761015 |
| C | 2.428447  | -1.286552 | -0.813536 |
| C | 3.801841  | -1.248648 | -1.050597 |
| C | 4.489562  | -0.046623 | -0.927288 |
| C | 3.790202  | 1.097968  | -0.556941 |
| C | 2.420923  | 1.013995  | -0.323988 |
| F | 1.845173  | -2.498577 | -0.946137 |
| F | 4.464423  | -2.363297 | -1.399154 |
| F | 5.808567  | 0.008423  | -1.155239 |
| F | 4.440173  | 2.266141  | -0.419010 |
| F | 1.810031  | 2.160267  | 0.065612  |
| C | -0.673511 | -1.678394 | -2.130715 |
| C | -1.339396 | -2.716716 | -2.773421 |
| C | -2.179730 | -3.546370 | -2.035566 |
| C | -2.344577 | -3.303590 | -0.676722 |
| C | -1.662257 | -2.245175 | -0.076553 |
| F | 0.119512  | -0.903262 | -2.908609 |
| F | -1.181414 | -2.924487 | -4.090207 |

|   |           |           |           |
|---|-----------|-----------|-----------|
| F | -2.834915 | -4.550004 | -2.631151 |
| F | -3.176299 | -4.072408 | 0.043579  |
| F | -1.933815 | -2.049917 | 1.234867  |
| C | -0.558509 | 1.280100  | 2.115565  |
| C | -0.558790 | 1.468056  | 3.497552  |
| C | -0.067353 | 0.467866  | 4.326814  |
| C | 0.417210  | -0.705451 | 3.753367  |
| C | 0.396985  | -0.846374 | 2.370869  |
| F | -1.054718 | 2.325724  | 1.394052  |
| F | -1.027202 | 2.610673  | 4.026991  |
| F | -0.058231 | 0.629395  | 5.655968  |
| F | 0.895242  | -1.683857 | 4.536381  |
| F | 0.885982  | -2.002839 | 1.871329  |
| O | -0.438773 | 1.128398  | -0.952665 |
| C | -1.568580 | 1.617427  | -1.144950 |
| C | -2.838382 | 1.056730  | -0.588902 |
| C | -1.640177 | 2.841786  | -1.998327 |
| H | -2.507548 | 2.803416  | -2.666459 |
| H | -1.782738 | 3.705524  | -1.332837 |
| H | -0.716939 | 2.980196  | -2.563182 |
| H | -3.316406 | 0.459453  | -1.379001 |
| H | -2.680531 | 0.419895  | 0.279884  |
| H | -3.525283 | 1.871723  | -0.340091 |

**Complex TS1b:**

SCF 6-31\*G+ = -2402.68849328615  
SCF 6-311\*\*G++ = -2402.702273357  
Gibbs free energy = -2402.50608  
sfinal(toluene) = -7.5185 kcal/mol  
sfinal(acetonitrile) = -15.2349 kcal/mol  
sfinal(DCM) = -13.2510 kcal/mol

46

|   |           |           |           |
|---|-----------|-----------|-----------|
| F | -2.414548 | -0.297394 | 5.004955  |
| C | -1.961406 | -1.448637 | 4.431669  |
| C | -1.471615 | -1.430561 | 3.126135  |
| C | -1.069938 | -2.677077 | 2.637273  |
| C | -1.126148 | -3.849876 | 3.386666  |
| C | -1.607468 | -3.807498 | 4.692346  |
| C | -2.032112 | -2.592636 | 5.220271  |
| B | -1.364187 | -0.077072 | 2.243628  |
| C | -2.707011 | 0.439655  | 1.497141  |
| C | -2.793724 | 1.756475  | 1.032521  |
| C | -3.897360 | 2.276992  | 0.366125  |
| C | -4.995709 | 1.455152  | 0.127257  |
| C | -4.964730 | 0.136720  | 0.568688  |
| C | -3.838423 | -0.341120 | 1.239738  |
| F | -2.510095 | -2.533713 | 6.475489  |
| F | -1.665186 | -4.923843 | 5.430940  |
| F | -0.724987 | -5.019183 | 2.864246  |
| F | -0.615961 | -2.789202 | 1.369938  |
| F | -1.762574 | 2.611794  | 1.256090  |
| F | -3.919194 | 3.560878  | -0.033171 |
| F | -6.072599 | 1.933884  | -0.509491 |
| F | -6.019278 | -0.663292 | 0.347886  |
| F | -3.884319 | -1.635276 | 1.621687  |
| C | 0.020504  | 0.091403  | 1.420506  |
| C | 0.119300  | -0.017435 | 0.031286  |
| C | 1.322531  | 0.089280  | -0.662323 |

|   |           |           |           |
|---|-----------|-----------|-----------|
| C | 2.500999  | 0.319146  | 0.041176  |
| C | 2.455234  | 0.435068  | 1.427404  |
| C | 1.232688  | 0.309691  | 2.080761  |
| F | -0.984685 | -0.257681 | -0.711907 |
| F | 1.250826  | 0.419178  | 3.432350  |
| F | 3.585964  | 0.658945  | 2.118281  |
| F | 3.667974  | 0.428016  | -0.608546 |
| F | 1.356615  | -0.032467 | -1.999355 |
| H | -1.209066 | 0.859802  | 3.194839  |
| H | -1.140759 | 1.586842  | 3.749710  |
| C | -1.720611 | 4.377925  | 5.894335  |
| C | -3.356131 | 2.871808  | 4.582737  |
| H | -4.018666 | 2.963465  | 5.450021  |
| H | -3.702623 | 3.600367  | 3.835677  |
| H | -3.428681 | 1.869350  | 4.160189  |
| H | -2.421143 | 5.195813  | 5.694703  |
| H | -1.919626 | 4.026844  | 6.917081  |
| H | -0.687657 | 4.725993  | 5.837455  |
| C | -1.950833 | 3.231799  | 4.956900  |
| O | -0.958001 | 2.625545  | 4.516310  |

#### Complex 4b:

SCF 6-31\*G+ = -2402.69360311138  
SCF 6-311\*\*G++ = -2402.708218199  
Gibbs free energy = -2402.506488  
sfinal(toluene) = -9.8110 kcal/mol  
sfinal(acetonitrile) = -19.6233 kcal/mol  
sfinal(DCM) = -17.0248 kcal/mol

46

|   |           |           |           |
|---|-----------|-----------|-----------|
| B | 0.114594  | -0.327500 | 0.053493  |
| C | -0.053948 | -0.140433 | 1.667627  |
| C | 1.616772  | -0.018290 | -0.518675 |
| C | -0.579751 | -1.688826 | -0.524996 |
| C | 2.557656  | -0.983669 | -0.889823 |
| C | 3.824735  | -0.676449 | -1.384597 |
| C | 4.205448  | 0.654273  | -1.530791 |
| C | 3.306998  | 1.654270  | -1.174878 |
| C | 2.056634  | 1.295166  | -0.681523 |
| F | 2.271836  | -2.296582 | -0.764115 |
| F | 4.684335  | -1.651058 | -1.722191 |
| F | 5.417134  | 0.968903  | -2.011896 |
| F | 3.645546  | 2.951175  | -1.318477 |
| F | 1.227453  | 2.335182  | -0.353367 |
| C | -1.271907 | -1.699028 | -1.734967 |
| C | -1.915234 | -2.814334 | -2.263189 |
| C | -1.876237 | -4.013199 | -1.559945 |
| C | -1.192960 | -4.064815 | -0.348178 |
| C | -0.566850 | -2.919294 | 0.138641  |
| F | -1.355568 | -0.557677 | -2.486559 |
| F | -2.571882 | -2.742166 | -3.436576 |
| F | -2.488421 | -5.104140 | -2.043894 |
| F | -1.141159 | -5.219828 | 0.335429  |
| F | 0.089277  | -3.047576 | 1.312073  |
| C | -1.288737 | 0.224169  | 2.209196  |
| C | -1.522508 | 0.407070  | 3.568842  |
| C | -0.477721 | 0.214461  | 4.467284  |
| C | 0.773680  | -0.153309 | 3.983031  |
| C | 0.959248  | -0.322313 | 2.611874  |

Supplementary Material (ESI) for Dalton Transactions  
This journal is © The Royal Society of Chemistry 2009

|   |           |           |           |
|---|-----------|-----------|-----------|
| F | -2.350917 | 0.426110  | 1.380900  |
| F | -2.738134 | 0.767763  | 4.019684  |
| F | -0.674756 | 0.383672  | 5.783542  |
| F | 1.789407  | -0.344685 | 4.842643  |
| F | 2.198574  | -0.695865 | 2.220151  |
| O | -1.750700 | 2.466594  | -0.756461 |
| C | -1.567404 | 3.068569  | -1.848673 |
| C | -2.353553 | 4.312685  | -2.061177 |
| C | -0.610149 | 2.589613  | -2.880148 |
| H | -0.939946 | 2.887771  | -3.879369 |
| H | 0.351159  | 3.089174  | -2.685582 |
| H | -0.450159 | 1.511248  | -2.828692 |
| H | -1.704406 | 5.105355  | -2.451439 |
| H | -3.107378 | 4.114619  | -2.836805 |
| H | -2.851242 | 4.631505  | -1.144123 |
| H | -0.577084 | 0.580076  | -0.453562 |
| H | -1.187161 | 1.567739  | -0.608884 |

**Complex TS2b:**

SCF 6-31\*G+ = -2402.70204434771  
SCF 6-311\*\*G++ = -2402.717373957  
Gibbs free energy = -2402.507919  
sfinal(toluene)= -4.6372 kcal/mol  
sfinal(acetonitrile)= -10.3222 kcal/mol  
sfinal(DCM)= -8.6905 kcal/mol

46

|   |           |           |           |
|---|-----------|-----------|-----------|
| B | 0.138366  | -0.432899 | 0.106161  |
| C | -0.011363 | -0.266201 | 1.720845  |
| C | 1.576450  | 0.010135  | -0.468551 |
| C | -0.583059 | -1.727358 | -0.534008 |
| C | 2.405893  | -0.777677 | -1.278632 |
| C | 3.653735  | -0.356270 | -1.736754 |
| C | 4.125468  | 0.907870  | -1.390553 |
| C | 3.340459  | 1.730763  | -0.585093 |
| C | 2.103991  | 1.268321  | -0.146006 |
| F | 2.039601  | -2.027444 | -1.628868 |
| F | 4.404583  | -1.156380 | -2.506927 |
| F | 5.316623  | 1.327257  | -1.828171 |
| F | 3.786002  | 2.943355  | -0.226491 |
| F | 1.392837  | 2.108694  | 0.640515  |
| C | -0.854349 | -1.804970 | -1.906273 |
| C | -1.552331 | -2.845567 | -2.509308 |
| C | -1.994440 | -3.910892 | -1.725392 |
| C | -1.692417 | -3.920795 | -0.366429 |
| C | -1.013622 | -2.841079 | 0.200288  |
| F | -0.462702 | -0.797177 | -2.723334 |
| F | -1.802169 | -2.832266 | -3.826746 |
| F | -2.662222 | -4.927257 | -2.278691 |
| F | -2.076818 | -4.956655 | 0.391914  |
| F | -0.786178 | -2.925725 | 1.527678  |
| C | -1.218384 | -0.018573 | 2.376736  |
| C | -1.369801 | 0.119694  | 3.751503  |
| C | -0.252115 | -0.025762 | 4.569428  |
| C | 0.978953  | -0.305148 | 3.981685  |
| C | 1.076425  | -0.417275 | 2.594084  |
| F | -2.377504 | 0.135035  | 1.651138  |
| F | -2.569632 | 0.384606  | 4.288241  |
| F | -0.362280 | 0.093480  | 5.895177  |

Supplementary Material (ESI) for Dalton Transactions  
This journal is © The Royal Society of Chemistry 2009

|   |           |           |           |
|---|-----------|-----------|-----------|
| F | 2.061419  | -0.464271 | 4.753601  |
| F | 2.300965  | -0.719486 | 2.117118  |
| C | -1.499364 | 1.648865  | -0.816977 |
| O | -1.706510 | 2.415993  | 0.271433  |
| H | -2.214240 | 1.896058  | 0.927141  |
| C | -0.674554 | 2.358667  | -1.858253 |
| C | -2.717847 | 0.911960  | -1.353118 |
| H | -0.445312 | 1.685705  | -2.686124 |
| H | -1.282452 | 3.184457  | -2.262818 |
| H | 0.239141  | 2.789677  | -1.445937 |
| H | -2.500187 | 0.428332  | -2.306992 |
| H | -3.122372 | 0.176562  | -0.654392 |
| H | -3.494859 | 1.671207  | -1.533341 |
| H | -0.676700 | 0.626200  | -0.399028 |

**Complex 2'b:**

SCF 6-31\*G+ = -194.3631454  
SCF 6-311\*\*G++ = -194.378609  
Gibbs free energy = -194.282848  
sfinal(toluene)= -3.3832 kcal/mol  
sfinal(acetonitrile)= -7.3404 kcal/mol  
sfinal(DCM)= -6.3135 kcal/mol

|   |           |           |           |
|---|-----------|-----------|-----------|
|   | 12        |           |           |
| C | 0.364939  | 0.031148  | 0.000000  |
| H | 1.465014  | 0.015789  | 0.000000  |
| C | -0.122766 | 0.724187  | 1.271164  |
| C | -0.122766 | 0.724187  | -1.271164 |
| O | -0.126028 | -1.327370 | 0.000000  |
| H | -1.218529 | 0.710993  | 1.308377  |
| H | 0.252844  | 0.209642  | 2.162617  |
| H | 0.212742  | 1.768181  | 1.304166  |
| H | -1.218529 | 0.710993  | -1.308377 |
| H | 0.212742  | 1.768181  | -1.304166 |
| H | 0.252844  | 0.209642  | -2.162617 |
| H | 0.619280  | -1.943505 | 0.000000  |

**Complex 2c:**

SCF 6-31\*G+ = -384.9095913  
SCF 6-311\*\*G++ = -384.921706  
sfinal(toluene)= -3.8050 kcal/mol  
sfinal(acetonitrile)= -8.0636 kcal/mol  
sfinal(DCM)= -6.9521 kcal/mol

|   |           |           |          |
|---|-----------|-----------|----------|
|   | 17        |           |          |
| O | 1.929551  | 1.651325  | 0.000000 |
| C | 0.708870  | 1.547550  | 0.000000 |
| C | -0.130495 | 2.817346  | 0.000000 |
| C | 0.067500  | 0.189534  | 0.000000 |
| C | -1.322765 | -0.014374 | 0.000000 |
| C | -1.850311 | -1.307867 | 0.000000 |
| C | -0.996588 | -2.412753 | 0.000000 |
| C | 0.390033  | -2.221517 | 0.000000 |
| C | 0.916269  | -0.932730 | 0.000000 |
| H | -2.006672 | 0.827501  | 0.000000 |
| H | -2.927701 | -1.451129 | 0.000000 |
| H | -1.408315 | -3.418972 | 0.000000 |
| H | 1.057745  | -3.079262 | 0.000000 |

Supplementary Material (ESI) for Dalton Transactions  
This journal is © The Royal Society of Chemistry 2009

|   |           |           |           |
|---|-----------|-----------|-----------|
| H | 1.988928  | -0.766883 | 0.000000  |
| H | -1.210443 | 2.664442  | 0.000000  |
| H | 0.143168  | 3.408380  | 0.881111  |
| H | 0.143168  | 3.408380  | -0.881111 |

**Complex 3c:**

SCF 6-31\*G+ = -2593.289260231  
SCF 6-311\*\*G++ = -2593.301434279  
sfinal(toluene)= -6.2713 kcal/mol  
sfinal(acetonitrile)= -13.7727 kcal/mol  
sfinal(DCM)= -11.6619 kcal/mol

51

|   |           |           |           |
|---|-----------|-----------|-----------|
| B | 0.056283  | -0.130430 | -0.111757 |
| C | -0.086068 | 0.107157  | 1.507377  |
| C | 1.666645  | -0.137042 | -0.446846 |
| C | -0.789435 | -1.375484 | -0.767667 |
| C | 2.422072  | -1.259932 | -0.797142 |
| C | 3.797559  | -1.224274 | -1.023421 |
| C | 4.487144  | -0.023874 | -0.895580 |
| C | 3.785779  | 1.121171  | -0.531744 |
| C | 2.414439  | 1.038484  | -0.310789 |
| F | 1.841227  | -2.471900 | -0.936044 |
| F | 4.459203  | -2.340599 | -1.368520 |
| F | 5.808153  | 0.031092  | -1.114512 |
| F | 4.435625  | 2.289953  | -0.390854 |
| F | 1.803226  | 2.189147  | 0.070912  |
| C | -0.665092 | -1.647537 | -2.136431 |
| C | -1.335212 | -2.675082 | -2.792122 |
| C | -2.197665 | -3.496010 | -2.070585 |
| C | -2.379574 | -3.255363 | -0.713729 |
| C | -1.691543 | -2.208605 | -0.100537 |
| F | 0.150030  | -0.883180 | -2.901226 |
| F | -1.158812 | -2.879907 | -4.107476 |
| F | -2.857662 | -4.489766 | -2.679000 |
| F | -3.233189 | -4.014694 | -0.007835 |
| F | -1.983565 | -2.011913 | 1.207201  |
| C | -0.507696 | 1.264378  | 2.163272  |
| C | -0.487534 | 1.423867  | 3.548652  |
| C | -0.016023 | 0.393526  | 4.352005  |
| C | 0.428770  | -0.781006 | 3.749589  |
| C | 0.388080  | -0.893768 | 2.364664  |
| F | -0.977018 | 2.336179  | 1.467808  |
| F | -0.917444 | 2.568737  | 4.105919  |
| F | 0.013700  | 0.528223  | 5.684529  |
| F | 0.889697  | -1.787542 | 4.508078  |
| F | 0.843448  | -2.051455 | 1.836053  |
| O | -0.460332 | 1.145986  | -0.914496 |
| C | -1.600101 | 1.648442  | -1.094073 |
| C | -2.835470 | 1.094530  | -0.447109 |
| C | -1.675957 | 2.804746  | -1.991982 |
| C | -2.917433 | 3.345652  | -2.384923 |
| C | -2.963916 | 4.431374  | -3.254266 |
| C | -1.776077 | 4.996697  | -3.729789 |
| C | -0.538419 | 4.472479  | -3.339612 |
| C | -0.484685 | 3.381324  | -2.480048 |
| H | -3.846647 | 2.916696  | -2.025425 |
| H | -3.923040 | 4.839195  | -3.559557 |
| H | -1.815121 | 5.848288  | -4.403849 |

Supplementary Material (ESI) for Dalton Transactions  
This journal is © The Royal Society of Chemistry 2009

|   |           |          |           |
|---|-----------|----------|-----------|
| H | 0.382394  | 4.916804 | -3.705762 |
| H | 0.468289  | 2.971897 | -2.165785 |
| H | -3.449883 | 1.905034 | -0.046194 |
| H | -3.431272 | 0.560861 | -1.199503 |
| H | -2.595087 | 0.402419 | 0.356398  |

**Complex TS1c:**

SCF 6-31\*G+ = -2594.437776  
SCF 6-311\*\*G++ = -2594.45541587  
sfinal(toluene)= -7.6060 kcal/mol  
sfinal(acetonitrile)= -15.7680 kcal/mol  
sfinal(DCM)= -13.2423 kcal/mol

53

|   |           |           |           |
|---|-----------|-----------|-----------|
| C | 1.134225  | 0.762661  | 1.668354  |
| C | -0.087932 | 0.259830  | 1.216639  |
| C | -0.161223 | 0.051847  | -0.162938 |
| C | 0.887587  | 0.322364  | -1.038427 |
| C | 2.081374  | 0.834284  | -0.538888 |
| C | 2.205137  | 1.058320  | 0.828813  |
| B | -1.301714 | -0.090812 | 2.236958  |
| C | -2.790840 | 0.205709  | 1.653285  |
| C | -3.140180 | 1.488344  | 1.219977  |
| C | -4.345373 | 1.803204  | 0.601234  |
| C | -5.280603 | 0.794901  | 0.385899  |
| C | -4.990590 | -0.498878 | 0.806370  |
| C | -3.770634 | -0.766337 | 1.427642  |
| F | -2.272831 | 2.517886  | 1.415359  |
| F | -4.617198 | 3.065119  | 0.221813  |
| F | -6.451329 | 1.071851  | -0.205108 |
| F | -5.888848 | -1.477529 | 0.611957  |
| F | -3.560152 | -2.050787 | 1.787380  |
| F | -1.284914 | -0.465166 | -0.710445 |
| F | 0.760393  | 0.090628  | -2.355674 |
| F | 3.101993  | 1.106746  | -1.365383 |
| F | 3.352608  | 1.554565  | 1.324826  |
| F | 1.323776  | 0.988421  | 2.993454  |
| C | -1.105474 | -1.448897 | 3.103662  |
| C | -1.509476 | -1.529988 | 4.436843  |
| C | -1.273077 | -2.626814 | 5.258548  |
| C | -0.618133 | -3.736701 | 4.734517  |
| C | -0.222720 | -3.724236 | 3.400186  |
| C | -0.468897 | -2.595609 | 2.620285  |
| F | -2.178410 | -0.486508 | 5.004776  |
| F | -0.076706 | -2.659664 | 1.328780  |
| F | 0.390453  | -4.799104 | 2.878752  |
| F | -0.381048 | -4.809502 | 5.502999  |
| F | -1.673783 | -2.624022 | 6.542588  |
| C | -3.375680 | 2.592025  | 4.643779  |
| C | -2.006111 | 3.142484  | 4.917329  |
| O | -0.977771 | 2.599265  | 4.433653  |
| H | -3.895084 | 2.382928  | 5.585463  |
| C | -1.815146 | 4.332386  | 5.753216  |
| H | -1.178816 | 0.827378  | 3.168823  |
| H | -1.123364 | 1.600697  | 3.732650  |
| C | -0.505160 | 4.786697  | 6.013415  |
| C | -0.303054 | 5.913851  | 6.800974  |
| C | -1.400229 | 6.601026  | 7.333485  |
| C | -2.703742 | 6.162680  | 7.077953  |
| C | -2.913334 | 5.031770  | 6.293465  |



Supplementary Material (ESI) for Dalton Transactions  
This journal is © The Royal Society of Chemistry 2009

|   |           |          |          |
|---|-----------|----------|----------|
| H | 0.336406  | 4.247039 | 5.592231 |
| H | 0.706627  | 6.260097 | 7.001137 |
| H | -1.239585 | 7.482305 | 7.948824 |
| H | -3.552036 | 6.700847 | 7.490358 |
| H | -3.928603 | 4.700798 | 6.100668 |
| H | -3.969404 | 3.330752 | 4.092250 |
| H | -3.323533 | 1.672409 | 4.062796 |

**Complex 4c:**

SCF 6-31\*G+ = -2594.44513909607  
SCF 6-311\*\*G++ = -2594.46365109  
sfinal(toluene)= -9.6869 kcal/mol  
sfinal(acetonitrile)= -19.2952 kcal/mol  
sfinal(DCM)= -16.7953 kcal/mol

53

|   |           |           |           |
|---|-----------|-----------|-----------|
| B | 0.132476  | -0.411468 | 0.028093  |
| C | -0.229984 | -0.163393 | 1.605777  |
| C | 1.701187  | -0.147782 | -0.370647 |
| C | -0.474161 | -1.804670 | -0.580790 |
| C | 2.667418  | -1.147988 | -0.517365 |
| C | 3.987869  | -0.900044 | -0.889395 |
| C | 4.402301  | 0.406022  | -1.132365 |
| C | 3.483406  | 1.439725  | -0.992628 |
| C | 2.178185  | 1.138392  | -0.616808 |
| F | 2.350618  | -2.438795 | -0.278104 |
| F | 4.868063  | -1.907621 | -1.013145 |
| F | 5.667519  | 0.665132  | -1.497088 |
| F | 3.857918  | 2.713574  | -1.226543 |
| F | 1.337004  | 2.212607  | -0.492352 |
| C | -0.883390 | -1.884685 | -1.911971 |
| C | -1.428466 | -3.022559 | -2.499207 |
| C | -1.582125 | -4.171972 | -1.731450 |
| C | -1.185710 | -4.152107 | -0.397428 |
| C | -0.646564 | -2.986635 | 0.144003  |
| F | -0.760453 | -0.796958 | -2.730426 |
| F | -1.807200 | -3.019596 | -3.792191 |
| F | -2.105439 | -5.284436 | -2.270338 |
| F | -1.322253 | -5.259571 | 0.352238  |
| F | -0.270043 | -3.049330 | 1.441170  |
| C | -1.540773 | 0.142150  | 1.981297  |
| C | -1.943683 | 0.393883  | 3.288995  |
| C | -1.002038 | 0.332112  | 4.311197  |
| C | 0.317347  | 0.023431  | 3.996587  |
| C | 0.673375  | -0.215546 | 2.670051  |
| F | -2.510766 | 0.215059  | 1.027378  |
| F | -3.224604 | 0.700948  | 3.570984  |
| F | -1.360986 | 0.572420  | 5.582266  |
| F | 1.235949  | -0.041578 | 4.975974  |
| F | 1.972772  | -0.522478 | 2.453482  |
| O | -1.497523 | 2.519778  | -0.508458 |
| C | -1.459867 | 3.165229  | -1.611375 |
| C | -2.107357 | 4.463928  | -1.618578 |
| C | -0.751400 | 2.588362  | -2.791763 |
| H | -0.494005 | 0.452929  | -0.605319 |
| H | -1.021720 | 1.596857  | -0.522355 |
| C | -2.052808 | 5.297180  | -2.757339 |
| C | -2.658907 | 6.548142  | -2.734467 |
| C | -3.332164 | 6.977466  | -1.584974 |

Supplementary Material (ESI) for Dalton Transactions  
This journal is © The Royal Society of Chemistry 2009

|   |           |          |           |
|---|-----------|----------|-----------|
| C | -3.397456 | 6.157803 | -0.450741 |
| C | -2.788376 | 4.909736 | -0.461198 |
| H | -1.531228 | 4.976532 | -3.652459 |
| H | -2.610057 | 7.188690 | -3.609781 |
| H | -3.808350 | 7.954202 | -1.573028 |
| H | -3.922519 | 6.496021 | 0.437406  |
| H | -2.832031 | 4.268298 | 0.411994  |
| H | -1.255395 | 2.840847 | -3.726275 |
| H | 0.263465  | 3.009056 | -2.823944 |
| H | -0.661589 | 1.503833 | -2.706676 |

**Complex TS2c:**

SCF 6-31\*G+ = -2594.431598901  
SCF 6-311\*\*G++ = -2594.450430788  
sfinal(toluene)= -6.7205 kcal/mol  
sfinal(acetonitrile)= -14.1734 kcal/mol  
sfinal(DCM)= -12.2037 kcal/mol

53

|   |           |           |           |
|---|-----------|-----------|-----------|
| C | -4.085080 | 1.025805  | -0.513443 |
| C | -2.915212 | 1.062168  | -1.300506 |
| C | -2.918798 | 0.392296  | -2.540376 |
| C | -4.045596 | -0.306040 | -2.967164 |
| C | -5.191478 | -0.345904 | -2.169430 |
| C | -5.209559 | 0.329334  | -0.945363 |
| C | -1.730130 | 1.839784  | -0.878865 |
| C | -0.802200 | 2.442754  | -1.891078 |
| O | -1.775199 | 2.542120  | 0.244630  |
| F | -2.268032 | 0.448507  | 1.854258  |
| C | -1.087731 | 0.145025  | 2.489574  |
| C | 0.012925  | -0.282642 | 1.750891  |
| C | 1.114091  | -0.626416 | 2.547660  |
| C | 1.135434  | -0.517017 | 3.937062  |
| C | 0.012262  | -0.047635 | 4.609941  |
| C | -1.118311 | 0.283656  | 3.872208  |
| F | 2.236350  | -1.126769 | 1.984433  |
| B | 0.060088  | -0.394900 | 0.115639  |
| C | 1.533897  | 0.021633  | -0.450632 |
| C | 2.424743  | -0.817210 | -1.129966 |
| C | 3.692150  | -0.419075 | -1.550251 |
| C | 4.130189  | 0.876021  | -1.291631 |
| C | 3.291476  | 1.747169  | -0.604038 |
| C | 2.036000  | 1.302993  | -0.201682 |
| F | -2.224603 | 0.730971  | 4.493349  |
| F | 2.230202  | -0.861284 | 4.632236  |
| F | 2.103871  | -2.106346 | -1.379825 |
| F | 4.499178  | -1.277366 | -2.195435 |
| F | 3.696183  | 3.000934  | -0.335032 |
| F | 1.278780  | 2.195504  | 0.489353  |
| C | -0.625311 | -1.719738 | -0.533192 |
| C | -0.699767 | -1.870509 | -1.923272 |
| C | -1.294373 | -2.947001 | -2.568615 |
| C | -1.862689 | -3.964550 | -1.808517 |
| C | -1.815204 | -3.875708 | -0.421909 |
| C | -1.212168 | -2.771912 | 0.181342  |
| F | -0.161225 | -0.916831 | -2.729897 |
| F | -1.343411 | -3.003615 | -3.912209 |
| F | -2.356109 | -4.851417 | 0.325903  |
| F | -1.213043 | -2.780402 | 1.533248  |
| F | 5.343404  | 1.277186  | -1.693646 |

Supplementary Material (ESI) for Dalton Transactions  
This journal is © The Royal Society of Chemistry 2009

|   |           |           |           |
|---|-----------|-----------|-----------|
| F | -2.454393 | -5.007905 | -2.405214 |
| F | 0.015792  | 0.076388  | 5.942861  |
| H | -2.358147 | 2.106391  | 0.895180  |
| H | -0.412237 | 1.697489  | -2.584512 |
| H | -1.369751 | 3.185884  | -2.468341 |
| H | 0.021248  | 2.945021  | -1.385090 |
| H | -0.727545 | 0.561830  | -0.350070 |
| H | -2.039440 | 0.405016  | -3.171212 |
| H | -4.023852 | -0.824603 | -3.921327 |
| H | -6.068470 | -0.894783 | -2.501365 |
| H | -6.102282 | 0.317449  | -0.327061 |
| H | -4.151080 | 1.558718  | 0.429965  |

**Complex 2'c:**

SCF 6-31\*G+ = -2637.39628018303  
SCF 6-311\*\*G++ = -386.124511959  
sfinal(toluene)= -4.0318 kcal/mol  
sfinal(acetonitrile)= -8.8812 kcal/mol  
sfinal(DCM)= -7.5854 kcal/mol

19

|   |           |           |           |
|---|-----------|-----------|-----------|
| C | -1.036948 | 2.216189  | 1.009730  |
| C | -0.689902 | 1.204812  | 1.913951  |
| C | -1.007381 | 1.368715  | 3.269202  |
| C | -1.649322 | 2.525065  | 3.717656  |
| C | -1.988931 | 3.532848  | 2.810616  |
| C | -1.683228 | 3.372129  | 1.456882  |
| C | 0.058007  | -0.036777 | 1.463475  |
| C | 1.573632  | 0.103412  | 1.668331  |
| O | -0.251116 | -0.267951 | 0.083004  |
| H | -0.301430 | -0.890201 | 2.060185  |
| H | -0.757272 | 0.583152  | 3.980690  |
| H | -1.891227 | 2.634829  | 4.772037  |
| H | -2.493683 | 4.431873  | 3.155622  |
| H | -1.952157 | 4.147418  | 0.743324  |
| H | -0.812508 | 2.084810  | -0.043896 |
| H | 1.810032  | 0.280565  | 2.723609  |
| H | 2.095203  | -0.812359 | 1.357099  |
| H | 1.959511  | 0.943624  | 1.080450  |
| H | 0.287196  | -1.010012 | -0.232419 |

**Complex 2d:**

SCF 6-31\*G+ = -429.0389259  
SCF 6-311\*\*G++ = -429.063421  
sfinal(toluene)= -2.4095 kcal/mol  
sfinal(acetonitrile)= -5.3001 kcal/mol  
sfinal(DCM)= -4.5024 kcal/mol

28

|   |           |           |          |
|---|-----------|-----------|----------|
| C | 2.107386  | 0.114412  | 2.938639 |
| C | 1.644878  | 0.084944  | 1.458207 |
| C | 2.333557  | 1.221716  | 0.671934 |
| C | 0.083580  | 0.133749  | 1.429366 |
| C | -0.773195 | 1.430613  | 1.593113 |
| C | -0.846974 | 2.130713  | 0.210207 |
| O | -0.513184 | -0.918372 | 1.260976 |
| C | 2.095101  | -1.257842 | 0.844701 |

|   |           |           |           |
|---|-----------|-----------|-----------|
| C | -2.203796 | 1.011839  | 1.994839  |
| C | -0.254639 | 2.425676  | 2.653367  |
| H | 3.420774  | 1.085979  | 0.729927  |
| H | 2.058596  | 1.199315  | -0.388843 |
| H | 2.111877  | 2.218145  | 1.061882  |
| H | 3.187957  | -0.071359 | 2.981340  |
| H | 1.917961  | 1.075074  | 3.424177  |
| H | 1.611760  | -0.670786 | 3.521476  |
| H | 3.190194  | -1.317190 | 0.862079  |
| H | 1.690406  | -2.109120 | 1.397660  |
| H | 1.762897  | -1.352991 | -0.194937 |
| H | -0.937356 | 3.283439  | 2.698013  |
| H | -0.233582 | 1.974693  | 3.652030  |
| H | 0.741259  | 2.818149  | 2.433671  |
| H | -1.560220 | 2.962748  | 0.265325  |
| H | 0.115239  | 2.540123  | -0.109117 |
| H | -1.201048 | 1.438214  | -0.562193 |
| H | -2.829825 | 1.906302  | 2.099845  |
| H | -2.655319 | 0.354467  | 1.248027  |
| H | -2.208474 | 0.476723  | 2.951210  |

### Complex 3d:

SCF 6-31\*G+ = -2637.39628018303  
SCF 6-311\*\*G++ = -2637.420816058  
sfinal(toluene)= -4.8437 kcal/mol  
sfinal(acetonitrile)= -10.1144 kcal/mol  
sfinal(DCM)= -8.7582 kcal/mol

62

|   |           |           |           |
|---|-----------|-----------|-----------|
| B | -0.059270 | -0.210371 | -0.037361 |
| C | -0.043678 | -0.031948 | 1.588341  |
| C | 1.502984  | 0.004224  | -0.516157 |
| C | -0.802263 | -1.526856 | -0.669359 |
| C | 2.337729  | -0.985338 | -1.047993 |
| C | 3.689932  | -0.788744 | -1.329195 |
| C | 4.277748  | 0.444712  | -1.074862 |
| C | 3.497977  | 1.459943  | -0.530093 |
| C | 2.155924  | 1.216101  | -0.258365 |
| F | 1.871687  | -2.226350 | -1.308855 |
| F | 4.428872  | -1.785435 | -1.842256 |
| F | 5.574214  | 0.651135  | -1.342571 |
| F | 4.043193  | 2.659083  | -0.264115 |
| F | 1.472895  | 2.243451  | 0.305645  |
| C | -0.798489 | -1.729669 | -2.055759 |
| C | -1.395785 | -2.811178 | -2.693173 |
| C | -2.054847 | -3.771843 | -1.931306 |
| C | -2.103687 | -3.616795 | -0.551308 |
| C | -1.492911 | -2.512809 | 0.044158  |
| F | -0.188433 | -0.830108 | -2.865503 |
| F | -1.349496 | -2.931093 | -4.029992 |
| F | -2.647289 | -4.817407 | -2.520501 |
| F | -2.756222 | -4.517808 | 0.199498  |
| F | -1.642507 | -2.430516 | 1.384559  |
| C | -0.440264 | 1.085324  | 2.324384  |
| C | -0.285965 | 1.196878  | 3.705630  |
| C | 0.315107  | 0.166500  | 4.417815  |
| C | 0.763581  | -0.956709 | 3.727445  |
| C | 0.586343  | -1.024352 | 2.349918  |
| F | -1.001139 | 2.164093  | 1.718782  |

|   |           |           |           |
|---|-----------|-----------|-----------|
| F | -0.707703 | 2.300385  | 4.347102  |
| F | 0.471203  | 0.257478  | 5.745245  |
| F | 1.363296  | -1.956200 | 4.392598  |
| F | 1.073639  | -2.122407 | 1.728275  |
| O | -0.870022 | 1.039950  | -0.732781 |
| C | -1.865862 | 1.674630  | -1.134432 |
| C | -3.304721 | 1.306124  | -0.694918 |
| C | -1.524870 | 2.829127  | -2.115212 |
| C | -2.466070 | 2.932623  | -3.340167 |
| C | -1.554319 | 4.156867  | -1.300143 |
| C | -0.093261 | 2.648696  | -2.665902 |
| C | -3.884163 | 0.388362  | -1.815739 |
| C | -3.346791 | 0.519048  | 0.631297  |
| C | -4.236612 | 2.526373  | -0.492745 |
| H | -4.375631 | 0.179696  | 0.794236  |
| H | -2.712682 | -0.363060 | 0.628778  |
| H | -3.069091 | 1.148390  | 1.478058  |
| H | -4.885697 | 0.070568  | -1.504955 |
| H | -3.978405 | 0.892937  | -2.778363 |
| H | -3.277112 | -0.510931 | -1.952214 |
| H | -5.218780 | 2.147700  | -0.188507 |
| H | -3.875014 | 3.173255  | 0.312358  |
| H | -4.389066 | 3.131886  | -1.385945 |
| H | -2.144599 | 3.792864  | -3.937515 |
| H | -2.386139 | 2.046426  | -3.978698 |
| H | -3.516168 | 3.089832  | -3.093031 |
| H | -1.129778 | 4.947423  | -1.929172 |
| H | -2.562062 | 4.463684  | -1.015803 |
| H | -0.940199 | 4.084010  | -0.396631 |
| H | 0.096437  | 3.436561  | -3.402858 |
| H | 0.657081  | 2.737597  | -1.880864 |
| H | 0.033080  | 1.681980  | -3.160975 |

**Complex TS1d:**

SCF 6-31\*G+ = -2638.55566778703  
SCF 6-311\*\*G++ = -2638.585610769  
sfinal(toluene)= -6.1448 kcal/mol  
sfinal(acetonitrile)= -12.2949 kcal/mol  
sfinal(DCM)= -10.4786 kcal/mol

64

|   |           |           |           |
|---|-----------|-----------|-----------|
| F | -1.730520 | -0.706125 | 5.175647  |
| C | -1.569670 | -1.778645 | 4.357169  |
| C | -1.443115 | -1.605444 | 2.980094  |
| C | -1.269067 | -2.788698 | 2.255469  |
| C | -1.224128 | -4.051237 | 2.837818  |
| C | -1.362539 | -4.170358 | 4.218813  |
| C | -1.536870 | -3.022899 | 4.984067  |
| B | -1.404495 | -0.176116 | 2.216803  |
| C | -2.723583 | 0.316818  | 1.408394  |
| C | -2.757659 | 1.596664  | 0.842626  |
| C | -3.818048 | 2.092179  | 0.093226  |
| C | -4.933130 | 1.286343  | -0.121297 |
| C | -4.960387 | 0.009462  | 0.428457  |
| C | -3.873290 | -0.444861 | 1.176741  |
| F | -1.671003 | -3.119383 | 6.319021  |
| F | -1.326703 | -5.376383 | 4.803232  |
| F | -1.057559 | -5.151689 | 2.086538  |
| F | -1.141969 | -2.727835 | 0.911019  |

|   |           |           |           |
|---|-----------|-----------|-----------|
| F | -1.716201 | 2.444770  | 1.045055  |
| F | -3.783687 | 3.339914  | -0.407369 |
| F | -5.972674 | 1.744444  | -0.832290 |
| F | -6.034785 | -0.773786 | 0.241295  |
| F | -3.993670 | -1.689110 | 1.688032  |
| C | 0.024104  | 0.063421  | 1.475164  |
| C | 0.218163  | -0.015537 | 0.093356  |
| C | 1.463965  | 0.124441  | -0.515844 |
| C | 2.590048  | 0.355273  | 0.268008  |
| C | 2.450492  | 0.436044  | 1.650448  |
| C | 1.188642  | 0.282159  | 2.217246  |
| F | -0.828761 | -0.237672 | -0.732017 |
| F | 1.118858  | 0.357314  | 3.570034  |
| F | 3.529773  | 0.657455  | 2.421546  |
| F | 3.796629  | 0.496737  | -0.300275 |
| F | 1.586766  | 0.039661  | -1.850851 |
| H | -1.368373 | 0.721720  | 3.201206  |
| H | -1.330686 | 1.485789  | 3.736792  |
| C | -0.857846 | 4.460049  | 5.721056  |
| C | -3.252578 | 3.272225  | 5.054308  |
| C | -3.932877 | 3.798433  | 6.337863  |
| C | -3.738452 | 4.108009  | 3.830011  |
| C | -3.709042 | 1.809321  | 4.862689  |
| C | -1.372143 | 5.891962  | 5.436626  |
| C | -0.837020 | 4.179621  | 7.250092  |
| C | 0.593782  | 4.369733  | 5.199101  |
| C | -1.715580 | 3.366922  | 5.039748  |
| O | -1.039133 | 2.540037  | 4.394226  |
| H | -4.800885 | 1.772804  | 4.938874  |
| H | -3.443660 | 1.406732  | 3.883714  |
| H | -3.296082 | 1.149398  | 5.630887  |
| H | -4.820148 | 3.964572  | 3.728755  |
| H | -3.552641 | 5.177975  | 3.952003  |
| H | -3.265122 | 3.777339  | 2.900606  |
| H | -5.017008 | 3.734984  | 6.194537  |
| H | -3.683293 | 3.181788  | 7.207298  |
| H | -3.701198 | 4.838622  | 6.569395  |
| H | -0.691677 | 6.601388  | 5.920389  |
| H | -1.361869 | 6.111811  | 4.363543  |
| H | -2.374200 | 6.088592  | 5.821014  |
| H | -0.089905 | 4.838598  | 7.706154  |
| H | -1.793821 | 4.373060  | 7.737126  |
| H | -0.536946 | 3.147077  | 7.462283  |
| H | 1.190909  | 5.147352  | 5.687240  |
| H | 1.049450  | 3.400779  | 5.417105  |
| H | 0.645308  | 4.527488  | 4.117229  |

**Complex 4d:**

SCF 6-31\*G+ = -2638.56389528685  
SCF 6-311\*\*G++ = -2638.594393869  
sfinal(toluene)= -8.6245 kcal/mol  
sfinal(acetonitrile)= -17.1310 kcal/mol  
sfinal(DCM)= -14.9281 kcal/mol  
64

|   |           |           |           |
|---|-----------|-----------|-----------|
| B | 0.215488  | -0.480257 | -0.213228 |
| C | -0.333232 | 0.093600  | 1.224170  |
| C | 1.836168  | -0.333750 | -0.435815 |
| C | -0.384205 | -1.962524 | -0.567884 |
| C | 2.767764  | -1.375296 | -0.379499 |

Supplementary Material (ESI) for Dalton Transactions  
This journal is © The Royal Society of Chemistry 2009

|   |           |           |           |
|---|-----------|-----------|-----------|
| C | 4.131317  | -1.208765 | -0.623251 |
| C | 4.628755  | 0.051213  | -0.940273 |
| C | 3.747168  | 1.124529  | -1.000210 |
| C | 2.398598  | 0.904004  | -0.744969 |
| F | 2.377038  | -2.628636 | -0.061544 |
| F | 4.973008  | -2.254321 | -0.554927 |
| F | 5.935685  | 0.229793  | -1.187272 |
| F | 4.199747  | 2.357015  | -1.308749 |
| F | 1.595963  | 2.013920  | -0.812846 |
| C | -0.716954 | -2.321262 | -1.874529 |
| C | -1.268949 | -3.548243 | -2.233030 |
| C | -1.506577 | -4.500195 | -1.248119 |
| C | -1.181927 | -4.201645 | 0.071601  |
| C | -0.633466 | -2.958675 | 0.380236  |
| F | -0.505698 | -1.444978 | -2.895661 |
| F | -1.576296 | -3.818526 | -3.516632 |
| F | -2.040198 | -5.690220 | -1.567003 |
| F | -1.396923 | -5.117729 | 1.032389  |
| F | -0.323549 | -2.749835 | 1.680784  |
| C | -1.674944 | 0.457390  | 1.362813  |
| C | -2.231029 | 0.978718  | 2.526569  |
| C | -1.425474 | 1.145434  | 3.648330  |
| C | -0.083490 | 0.786976  | 3.573245  |
| C | 0.428566  | 0.273818  | 2.381436  |
| F | -2.522520 | 0.320025  | 0.304352  |
| F | -3.531383 | 1.333796  | 2.571984  |
| F | -1.935901 | 1.649711  | 4.783505  |
| F | 0.705471  | 0.939015  | 4.651913  |
| F | 1.737916  | -0.064744 | 2.399824  |
| O | -1.161601 | 2.415570  | -1.085531 |
| C | -1.327785 | 3.306378  | -1.971565 |
| C | -2.094435 | 4.511330  | -1.418268 |
| C | -0.802254 | 3.098171  | -3.388017 |
| C | -1.811067 | 3.544437  | -4.475835 |
| C | 0.513560  | 3.935124  | -3.502196 |
| C | -0.458316 | 1.616472  | -3.650657 |
| C | -1.644407 | 5.881288  | -1.972468 |
| C | -3.595189 | 4.253606  | -1.773252 |
| C | -1.969293 | 4.555160  | 0.124654  |
| H | -0.279115 | 0.256129  | -1.086037 |
| H | -0.712102 | 1.503178  | -1.272637 |
| H | -4.188877 | 5.023415  | -1.268757 |
| H | -3.797204 | 4.320500  | -2.844110 |
| H | -3.931501 | 3.278475  | -1.406006 |
| H | -2.289932 | 6.648192  | -1.531940 |
| H | -0.615723 | 6.112697  | -1.678598 |
| H | -1.728037 | 5.973445  | -3.056226 |
| H | -2.500310 | 5.440222  | 0.489027  |
| H | -2.407161 | 3.676105  | 0.601311  |
| H | -0.923879 | 4.631677  | 0.441489  |
| H | -1.333593 | 3.401389  | -5.450481 |
| H | -2.714473 | 2.926173  | -4.458773 |
| H | -2.102122 | 4.592887  | -4.406949 |
| H | 0.971645  | 3.686137  | -4.465520 |
| H | 0.333978  | 5.010954  | -3.483195 |
| H | 1.228584  | 3.675874  | -2.715904 |
| H | -0.164420 | 1.512614  | -4.699756 |
| H | 0.380476  | 1.257701  | -3.050405 |
| H | -1.313020 | 0.952943  | -3.485801 |

**Complex TS2d:**

Supplementary Material (ESI) for Dalton Transactions  
This journal is © The Royal Society of Chemistry 2009

SCF 6-31\*G+ = -2638.53156494131  
SCF 6-311\*\*G++ = -2638.56245818  
sfinal(toluene)= -5.2173 kcal/mol  
sfinal(acetonitrile)= -11.7399 kcal/mol  
sfinal(DCM)= -9.9076 kcal/mol

64

|   |           |           |           |
|---|-----------|-----------|-----------|
| C | 0.958396  | -1.438186 | 2.349135  |
| C | 0.152847  | -0.450203 | 1.756756  |
| C | -0.476288 | 0.366090  | 2.690541  |
| C | -0.337394 | 0.246372  | 4.073039  |
| C | 0.473716  | -0.749241 | 4.599332  |
| C | 1.129402  | -1.604578 | 3.718760  |
| B | 0.180409  | -0.415083 | 0.099788  |
| C | -0.431000 | -1.765324 | -0.586134 |
| C | -0.207246 | -2.125759 | -1.925453 |
| C | -0.699272 | -3.280753 | -2.525150 |
| C | -1.483362 | -4.159799 | -1.785817 |
| C | -1.763045 | -3.848655 | -0.461297 |
| C | -1.248388 | -2.680930 | 0.098741  |
| F | 0.513549  | -1.324726 | -2.736923 |
| F | -0.433206 | -3.545093 | -3.814409 |
| F | -1.975469 | -5.271126 | -2.345065 |
| F | -2.537526 | -4.667044 | 0.269021  |
| F | -1.620756 | -2.465054 | 1.382562  |
| F | -1.301223 | 1.384448  | 2.305122  |
| F | -0.982221 | 1.093455  | 4.893599  |
| F | 0.622342  | -0.883080 | 5.923982  |
| F | 1.914287  | -2.583154 | 4.195235  |
| F | 1.614141  | -2.321134 | 1.560082  |
| C | 1.711947  | 0.040421  | -0.253879 |
| C | 2.718545  | -0.749049 | -0.828451 |
| C | 4.039994  | -0.325016 | -0.975302 |
| C | 4.422750  | 0.931230  | -0.519624 |
| C | 3.473011  | 1.740432  | 0.096392  |
| C | 2.168244  | 1.277869  | 0.221978  |
| F | 2.476927  | -2.014768 | -1.222199 |
| F | 4.953051  | -1.134169 | -1.535416 |
| F | 5.686954  | 1.350802  | -0.657448 |
| F | 3.819235  | 2.950217  | 0.567750  |
| F | 1.308584  | 2.097901  | 0.875017  |
| C | -1.667905 | 1.866821  | -0.962660 |
| C | -3.028057 | 1.085767  | -1.022498 |
| O | -1.574677 | 2.711115  | 0.058521  |
| C | -0.946112 | 2.497227  | -2.201712 |
| H | -1.973610 | 2.350535  | 0.870725  |
| C | -0.234368 | 1.474045  | -3.102504 |
| C | -1.973425 | 3.279314  | -3.070513 |
| C | 0.101147  | 3.537825  | -1.738651 |
| C | -3.117540 | 0.076628  | -2.179832 |
| C | -3.311098 | 0.346237  | 0.306352  |
| C | -4.188310 | 2.122069  | -1.174476 |
| H | -0.664431 | 0.643418  | -0.454458 |
| H | -1.403918 | 3.826743  | -3.829435 |
| H | -2.673176 | 2.628436  | -3.599207 |
| H | -2.534571 | 4.014593  | -2.486590 |
| H | 0.173183  | 2.003778  | -3.970885 |
| H | 0.598261  | 1.002110  | -2.581975 |
| H | -0.892731 | 0.689463  | -3.475324 |



Supplementary Material (ESI) for Dalton Transactions  
This journal is © The Royal Society of Chemistry 2009

|   |           |           |           |
|---|-----------|-----------|-----------|
| H | 0.628897  | 3.908161  | -2.624108 |
| H | -0.361727 | 4.391598  | -1.237071 |
| H | 0.837045  | 3.112994  | -1.059063 |
| H | -4.222371 | -0.247771 | 0.184308  |
| H | -2.509532 | -0.331118 | 0.593267  |
| H | -3.501105 | 1.029787  | 1.141481  |
| H | -5.129024 | 1.596821  | -0.976649 |
| H | -4.107000 | 2.941450  | -0.453262 |
| H | -4.255904 | 2.546622  | -2.175363 |
| H | -4.093908 | -0.418795 | -2.137204 |
| H | -3.041159 | 0.553315  | -3.159378 |
| H | -2.351295 | -0.695408 | -2.108496 |

**Complex 2'd:**

SCF 6-31\*G+ = -430.2334218  
SCF 6-311\*\*G++ = -430.265072  
sfinal(toluene)= -2.2751 kcal/mol  
sfinal(acetonitrile)= -5.0999 kcal/mol  
sfinal(DCM)= -4.3459 kcal/mol

30

|   |           |           |           |
|---|-----------|-----------|-----------|
| C | 2.174598  | 0.292561  | 2.962093  |
| C | 1.623187  | 0.049013  | 1.539222  |
| C | 2.272687  | 1.044062  | 0.557809  |
| C | 0.053671  | 0.071005  | 1.513484  |
| C | -0.797828 | 1.385227  | 1.712518  |
| C | -0.751190 | 2.328296  | 0.491452  |
| O | -0.317574 | -0.544156 | 0.265070  |
| C | 2.063232  | -1.382274 | 1.137193  |
| C | -2.271324 | 0.937257  | 1.907541  |
| C | -0.402667 | 2.174303  | 2.976415  |
| H | -0.247606 | -0.603178 | 2.334238  |
| H | 3.348730  | 0.841667  | 0.482714  |
| H | 1.843440  | 0.951227  | -0.445119 |
| H | 2.162007  | 2.082606  | 0.887658  |
| H | 3.250461  | 0.078844  | 2.974279  |
| H | 2.048077  | 1.320397  | 3.307381  |
| H | 1.701923  | -0.373294 | 3.695970  |
| H | 3.149348  | -1.480830 | 1.257364  |
| H | 1.586059  | -2.138400 | 1.774400  |
| H | 1.805437  | -1.609406 | 0.100744  |
| H | -1.149312 | 2.954613  | 3.171509  |
| H | -0.355718 | 1.533686  | 3.865579  |
| H | 0.562823  | 2.675453  | 2.863460  |
| H | -1.508261 | 3.115159  | 0.603030  |
| H | 0.218265  | 2.821621  | 0.384566  |
| H | -0.957027 | 1.787887  | -0.437584 |
| H | -2.906308 | 1.805515  | 2.119390  |
| H | -2.692794 | 0.459791  | 1.012861  |
| H | -2.372758 | 0.238522  | 2.748345  |
| H | -1.263766 | -0.746648 | 0.282273  |

**Complex 3'b:**

SCF 6-31\*G+ = -2103.864445996  
SCF 6-311\*\*G++ = -2103.877183858  
sfinal(toluene)= -7.6315 kcal/mol  
sfinal(acetonitrile)= -15.7147 kcal/mol  
sfinal(DCM)= -13.5583 kcal/mol

44

|   |           |           |           |
|---|-----------|-----------|-----------|
| C | 12.052892 | 2.336346  | 4.155612  |
| C | 11.563813 | 2.971260  | 3.012866  |
| C | 12.553272 | 3.596021  | 2.239678  |
| C | 13.905905 | 3.587929  | 2.568870  |
| C | 14.355401 | 2.947740  | 3.713972  |
| C | 13.403344 | 2.318789  | 4.500521  |
| B | 9.999151  | 3.160089  | 2.546900  |
| C | 8.619255  | 1.594133  | 4.177948  |
| C | 9.017892  | 0.261789  | 3.628321  |
| F | 12.194275 | 4.231568  | 1.100214  |
| F | 14.795879 | 4.206390  | 1.762614  |
| F | 13.781710 | 1.673128  | 5.626404  |
| F | 11.214953 | 1.683232  | 5.015788  |
| C | 9.665449  | 4.766836  | 2.515691  |
| C | 9.374844  | 5.517682  | 1.372880  |
| C | 9.135161  | 6.889623  | 1.413064  |
| C | 9.178138  | 7.593126  | 2.607429  |
| C | 9.479956  | 6.877196  | 3.757037  |
| C | 9.723219  | 5.508800  | 3.702697  |
| F | 9.328407  | 4.933088  | 0.153131  |
| F | 10.043448 | 4.895805  | 4.871091  |
| F | 9.545719  | 7.514550  | 4.947541  |
| F | 8.855928  | 7.542828  | 0.264036  |
| C | 9.495316  | 2.332611  | 1.229965  |
| C | 10.296311 | 1.565620  | 0.378150  |
| C | 9.791542  | 0.907350  | -0.743973 |
| C | 8.444550  | 0.960110  | -1.066664 |
| C | 7.619043  | 1.698924  | -0.229809 |
| C | 8.139997  | 2.360379  | 0.875771  |
| F | 11.617304 | 1.405621  | 0.619604  |
| F | 10.635959 | 0.194159  | -1.518850 |
| F | 6.295191  | 1.777167  | -0.485948 |
| F | 7.261754  | 3.063636  | 1.639741  |
| C | 7.672322  | 1.632198  | 5.335117  |
| H | 15.406283 | 2.935682  | 3.979480  |
| H | 8.052547  | 0.444871  | -1.936462 |
| H | 8.990317  | 8.660357  | 2.638559  |
| H | 8.168293  | -0.153730 | 3.069835  |
| H | 9.881085  | 0.315515  | 2.968722  |
| H | 9.224465  | -0.421267 | 4.459865  |
| H | 6.848831  | 0.923955  | 5.186808  |
| H | 8.217737  | 1.311948  | 6.233633  |
| H | 7.290041  | 2.641992  | 5.490675  |
| O | 9.022928  | 2.689282  | 3.747631  |

**Complex TS1'b:**

SCF 6-31\*G+ = -2105.011567073  
SCF 6-311\*\*G++ = -2105.029985164  
sfinal(toluene)= -8.9941 kcal/mol  
sfinal(acetonitrile)= -18.2972 kcal/mol  
sfinal(DCM)= -15.7986 kcal/mol

46

|   |           |           |          |
|---|-----------|-----------|----------|
| F | -2.515700 | -0.348951 | 4.966144 |
| C | -2.023000 | -1.493745 | 4.405814 |

|   |           |           |           |
|---|-----------|-----------|-----------|
| C | -1.485594 | -1.460065 | 3.118112  |
| C | -1.036203 | -2.693451 | 2.637425  |
| C | -1.104258 | -3.863018 | 3.390041  |
| C | -1.630682 | -3.860347 | 4.674649  |
| C | -2.092167 | -2.650655 | 5.173500  |
| B | -1.371632 | -0.092567 | 2.260738  |
| C | -2.709649 | 0.435765  | 1.511249  |
| C | -2.799819 | 1.764543  | 1.083687  |
| C | -3.904220 | 2.281310  | 0.417125  |
| C | -4.999412 | 1.477447  | 0.130619  |
| C | -4.942122 | 0.153249  | 0.540918  |
| C | -3.829704 | -0.348202 | 1.216746  |
| F | -2.618817 | -2.591374 | 6.418135  |
| H | -1.683243 | -4.769370 | 5.262869  |
| F | -0.652660 | -5.018614 | 2.857846  |
| F | -0.530332 | -2.788952 | 1.386920  |
| F | -1.778655 | 2.623288  | 1.354042  |
| F | -3.913652 | 3.586618  | 0.059807  |
| H | -5.864578 | 1.867147  | -0.393757 |
| F | -5.982129 | -0.668193 | 0.284573  |
| F | -3.864530 | -1.654906 | 1.561320  |
| C | 0.010541  | 0.091802  | 1.437160  |
| C | 0.106482  | -0.043110 | 0.049811  |
| C | 1.308603  | 0.099743  | -0.637722 |
| C | 2.488425  | 0.387240  | 0.035038  |
| C | 2.422839  | 0.517638  | 1.415382  |
| C | 1.215598  | 0.365594  | 2.089704  |
| F | -0.995095 | -0.339635 | -0.679745 |
| F | 1.234703  | 0.497378  | 3.442134  |
| F | 3.545426  | 0.791808  | 2.117656  |
| H | 3.426171  | 0.499975  | -0.497112 |
| F | 1.324058  | -0.046275 | -1.980852 |
| H | -1.225797 | 0.816460  | 3.219787  |
| H | -1.130204 | 1.568412  | 3.769273  |
| C | -1.651319 | 4.409203  | 5.798538  |
| C | -3.316634 | 2.867114  | 4.565697  |
| H | -3.976126 | 3.020875  | 5.426265  |
| H | -3.650272 | 3.556028  | 3.776191  |
| H | -3.405793 | 1.843405  | 4.201247  |
| H | -2.324663 | 5.235782  | 5.547067  |
| H | -1.873603 | 4.117716  | 6.834934  |
| H | -0.608113 | 4.723959  | 5.735827  |
| C | -1.906492 | 3.226408  | 4.916141  |
| O | -0.923187 | 2.590378  | 4.494012  |

**Complex 4'b:**

SCF 6-31\*G+ = -2105.014347159  
SCF 6-311\*\*G++ = -2105.033766013  
sfinal(toluene)= -10.9926 kcal/mol  
sfinal(acetonitrile)= -21.8996 kcal/mol  
sfinal(DCM)= -18.8363 kcal/mol

46

|   |           |           |           |
|---|-----------|-----------|-----------|
| C | -0.134256 | 0.770952  | 0.200772  |
| C | -0.061287 | -0.121784 | 1.273470  |
| C | 1.129522  | -0.851721 | 1.333334  |
| C | 2.155970  | -0.702445 | 0.402404  |
| C | 2.048153  | 0.192452  | -0.654048 |
| C | 0.876824  | 0.930718  | -0.740941 |

|   |           |           |           |
|---|-----------|-----------|-----------|
| B | -1.293995 | -0.256425 | 2.339003  |
| C | -1.495707 | -1.742127 | 2.983476  |
| C | -1.018300 | -2.123463 | 4.241290  |
| C | -1.237722 | -3.388911 | 4.780641  |
| C | -1.952450 | -4.355364 | 4.084584  |
| C | -2.434871 | -4.006980 | 2.831424  |
| C | -2.203568 | -2.738752 | 2.312152  |
| F | -0.296066 | -1.255378 | 4.983967  |
| F | -0.741537 | -3.680820 | 6.003227  |
| F | -3.140075 | -4.906477 | 2.103638  |
| F | -2.715433 | -2.487514 | 1.063026  |
| F | 1.333458  | -1.736775 | 2.333501  |
| F | 3.277958  | -1.442508 | 0.531985  |
| F | 0.704795  | 1.809638  | -1.759481 |
| F | -1.256870 | 1.537296  | 0.031533  |
| C | -1.378912 | 0.952435  | 3.430213  |
| C | -2.617830 | 1.365435  | 3.927425  |
| C | -2.763864 | 2.395346  | 4.850414  |
| C | -1.655810 | 3.076539  | 5.335273  |
| C | -0.410147 | 2.686802  | 4.862610  |
| C | -0.282080 | 1.653774  | 3.937356  |
| F | -3.755509 | 0.745862  | 3.503583  |
| F | 0.973035  | 1.329369  | 3.545455  |
| F | 0.699236  | 3.317293  | 5.310263  |
| F | -4.002284 | 2.736698  | 5.277529  |
| O | -4.119982 | 0.187466  | 0.362050  |
| C | -4.089512 | -0.180765 | -0.842582 |
| C | -5.329388 | 0.055402  | -1.634897 |
| C | -2.909544 | -0.833625 | -1.471036 |
| H | -1.757844 | 3.878085  | 6.057863  |
| H | -2.122686 | -5.341104 | 4.502154  |
| H | 2.847602  | 0.310394  | -1.376597 |
| H | -2.565136 | -0.209886 | -2.306320 |
| H | -2.093180 | -1.003465 | -0.772585 |
| H | -3.226058 | -1.792375 | -1.902805 |
| H | -5.083138 | 0.559984  | -2.576449 |
| H | -5.767992 | -0.915787 | -1.901897 |
| H | -6.053505 | 0.639463  | -1.065016 |
| H | -2.321891 | -0.073088 | 1.654048  |
| H | -3.227207 | 0.032863  | 0.947112  |

**Complex TS2'b:**

SCF 6-31\*G+ = -2105.012911605  
SCF 6-311\*\*G++ = -2105.032558946  
sfinal(toluene)= -8.1470 kcal/mol  
sfinal(acetonitrile)= -17.6557 kcal/mol  
sfinal(DCM)= -15.0109 kcal/mol

46

|   |           |           |           |
|---|-----------|-----------|-----------|
| B | 0.037467  | -0.383472 | 0.106271  |
| C | -0.052763 | -0.273866 | 1.730593  |
| C | 1.504251  | 0.026002  | -0.469554 |
| C | -0.640409 | -1.724777 | -0.528757 |
| C | 2.388229  | -0.819787 | -1.149494 |
| C | 3.645072  | -0.403694 | -1.585432 |
| C | 4.098678  | 0.886926  | -1.352001 |
| C | 3.247373  | 1.746641  | -0.671682 |
| C | 1.992735  | 1.318518  | -0.253359 |
| F | 2.061472  | -2.109564 | -1.395006 |

Supplementary Material (ESI) for Dalton Transactions  
This journal is © The Royal Society of Chemistry 2009

|   |           |           |           |
|---|-----------|-----------|-----------|
| F | 4.432970  | -1.279316 | -2.246110 |
| H | 5.078086  | 1.210170  | -1.685594 |
| F | 3.637333  | 3.015639  | -0.415037 |
| F | 1.220794  | 2.215371  | 0.418328  |
| C | -0.884051 | -1.822783 | -1.903991 |
| C | -1.363539 | -2.969574 | -2.525068 |
| C | -1.695079 | -4.091914 | -1.777585 |
| C | -1.509366 | -4.016894 | -0.406064 |
| C | -0.987675 | -2.871234 | 0.194896  |
| F | -0.582469 | -0.763299 | -2.710351 |
| F | -1.521391 | -2.988829 | -3.867057 |
| H | -2.083129 | -4.989117 | -2.245937 |
| F | -1.838302 | -5.072662 | 0.367713  |
| F | -0.828772 | -2.919764 | 1.538041  |
| C | -1.168611 | 0.185715  | 2.426595  |
| C | -1.244132 | 0.280944  | 3.810829  |
| C | -0.167456 | -0.088873 | 4.602437  |
| C | 0.962195  | -0.561277 | 3.948105  |
| C | 1.009826  | -0.653567 | 2.559386  |
| F | -2.307349 | 0.548212  | 1.735257  |
| F | -2.380985 | 0.739459  | 4.382011  |
| H | -0.207010 | -0.017050 | 5.683253  |
| F | 2.036848  | -0.945769 | 4.666093  |
| F | 2.139056  | -1.168110 | 2.023297  |
| C | -1.685221 | 1.999900  | -0.873042 |
| O | -1.723804 | 2.703219  | 0.237625  |
| H | -2.304927 | 2.281181  | 0.902863  |
| C | -0.758555 | 2.558996  | -1.902851 |
| C | -2.884446 | 1.202064  | -1.284836 |
| H | -0.316074 | 1.762076  | -2.501679 |
| H | -1.344248 | 3.208168  | -2.569456 |
| H | 0.026104  | 3.151129  | -1.428746 |
| H | -2.602570 | 0.399444  | -1.964844 |
| H | -3.408602 | 0.772589  | -0.428589 |
| H | -3.566045 | 1.886352  | -1.810947 |
| H | -0.704596 | 0.606680  | -0.354155 |
